# Supplementary material
Source: PubMed Central journal article supplement (PMC3954789)
Supplement: NIHMS205023-supplement-Figures.pdf [file NIHMS205023-supplement-Figures.pdf]

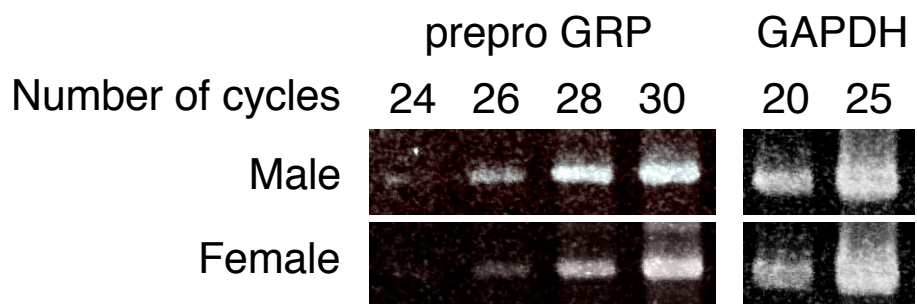

Figure S1.

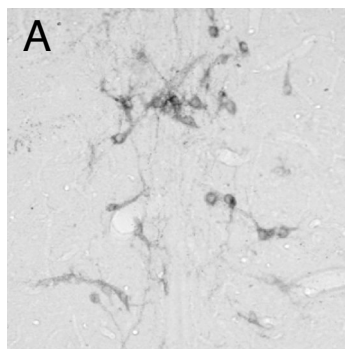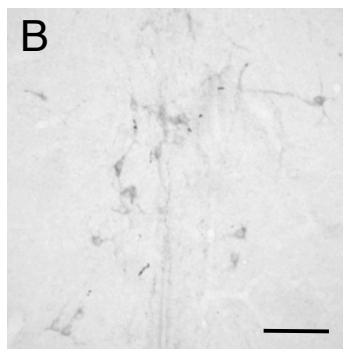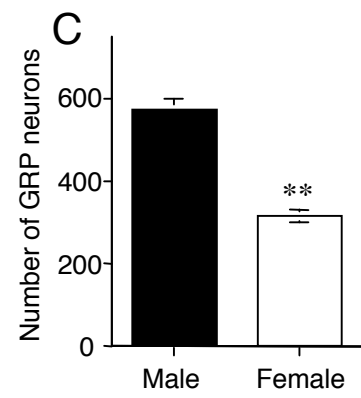

200  $\mu$ m

Figure S2.

Experiment

Control

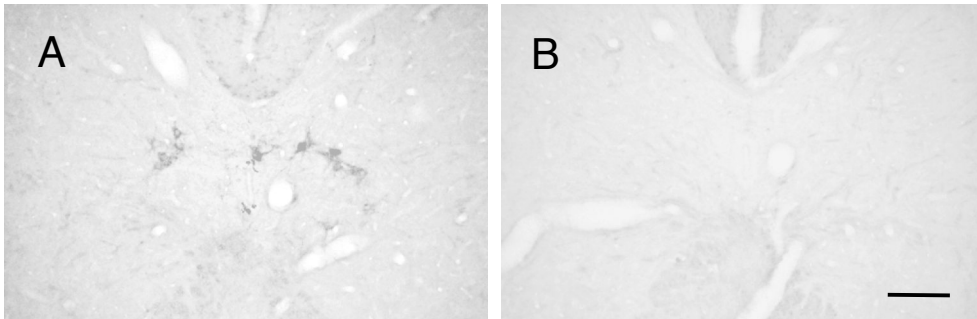

100  $\mu\text{m}$

Figure S3.

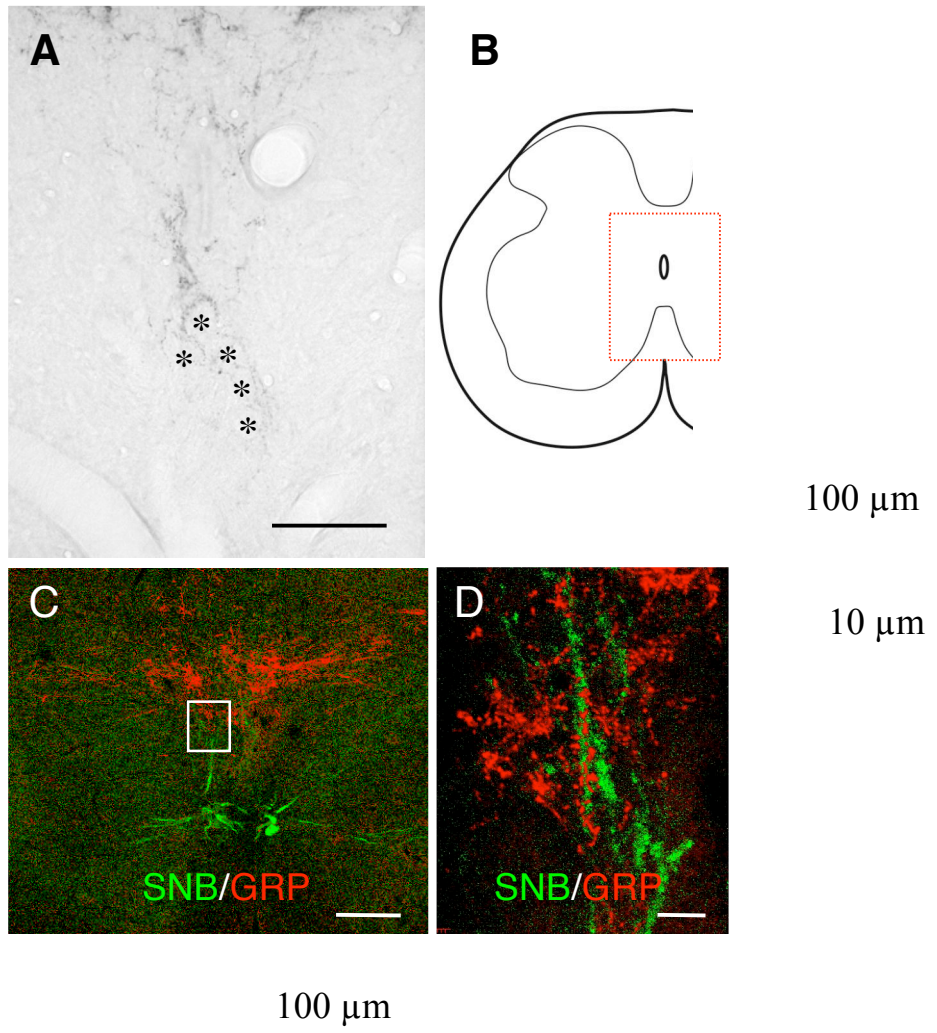

Figure S4.

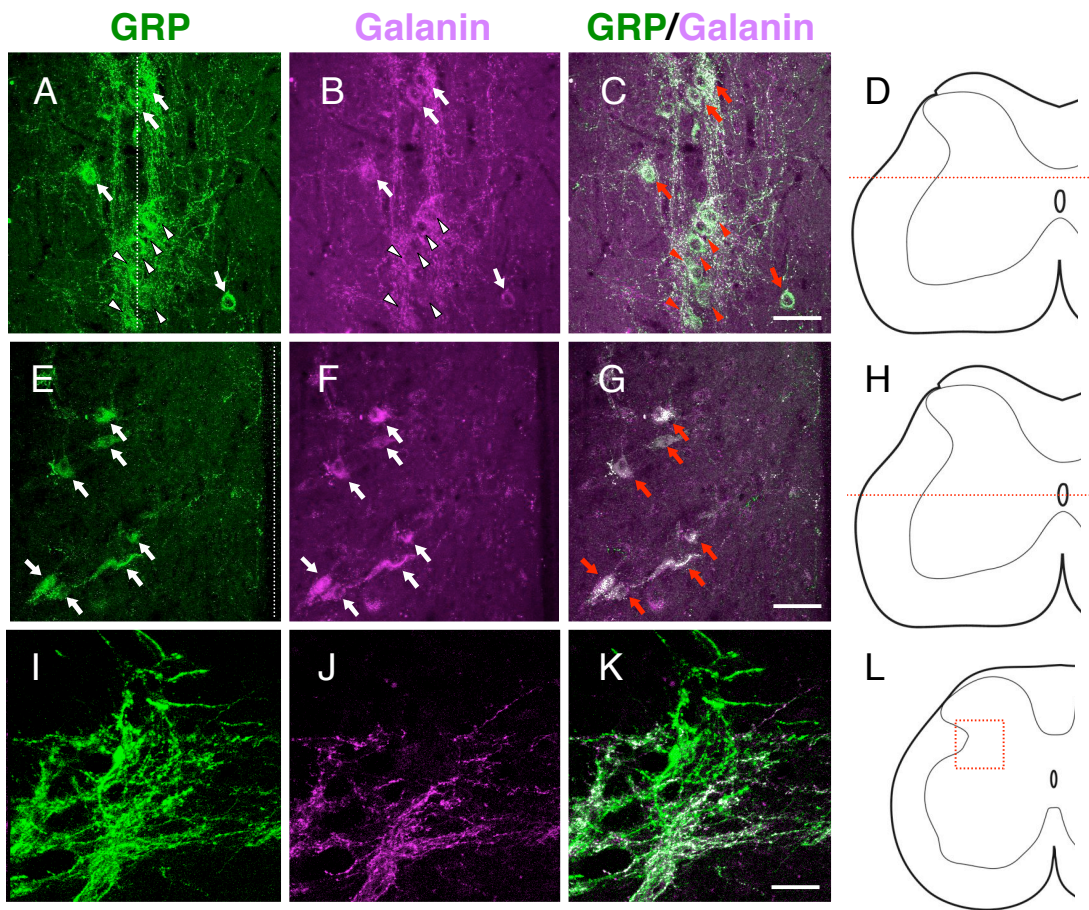

50  $\mu$ m

Figure S5.

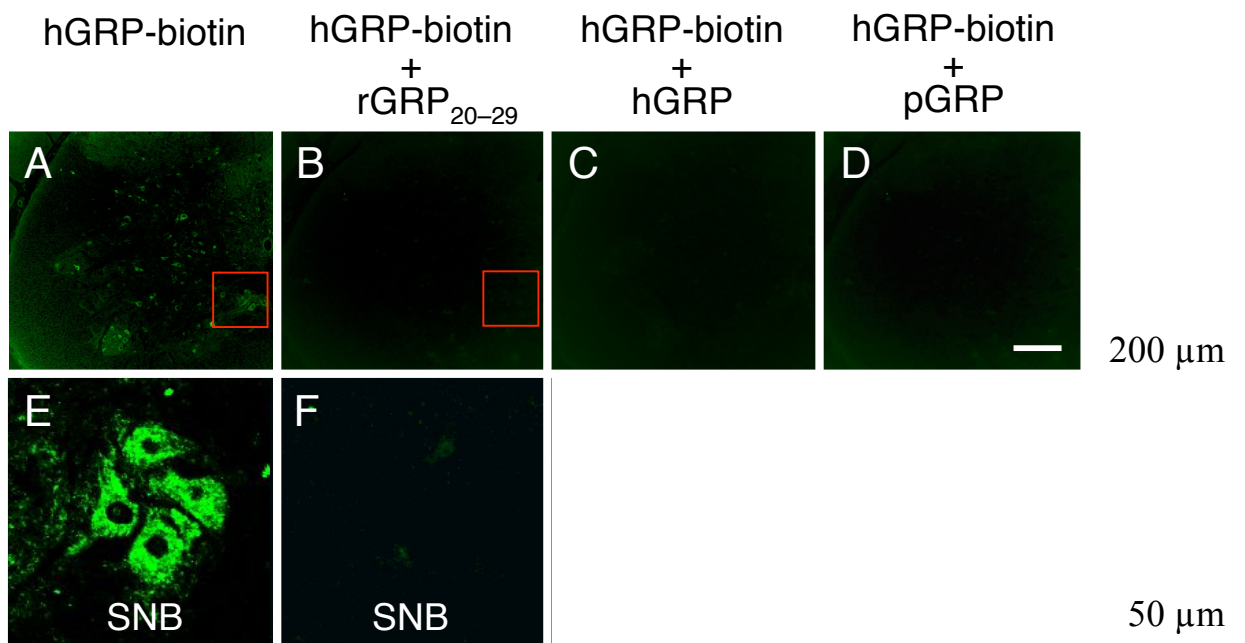

Figure S6.

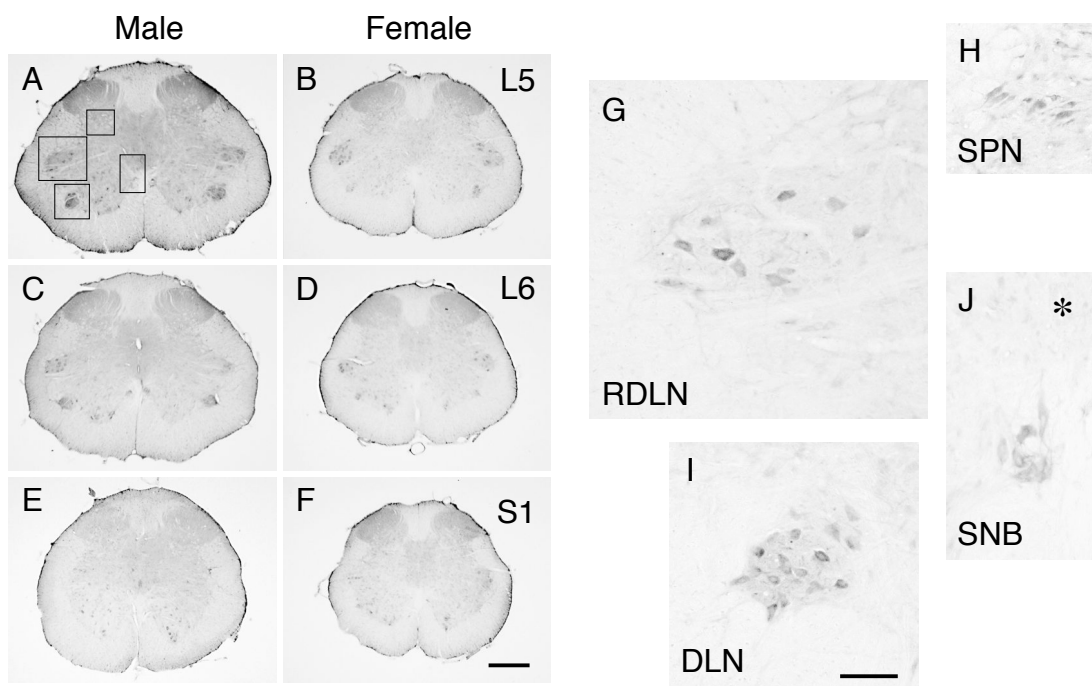

Bars = 100  $\mu$ m  
 \* : central canal

Figure S7.

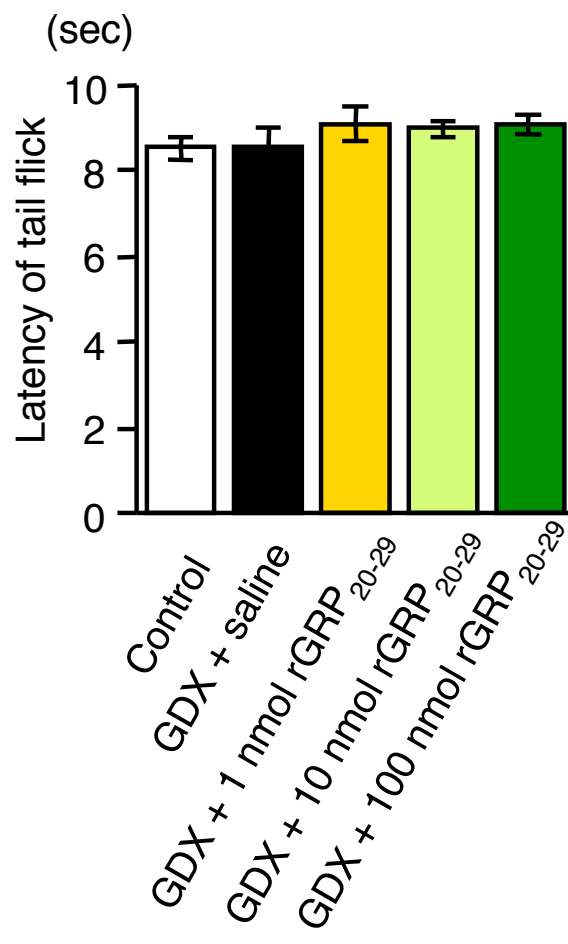

Figure S8.
